# Supplementary material
Source: MDPI journal article supplement (https://www.mdpi.com/2079-6412/7/9/145)
Supplement: s1 [file s1]

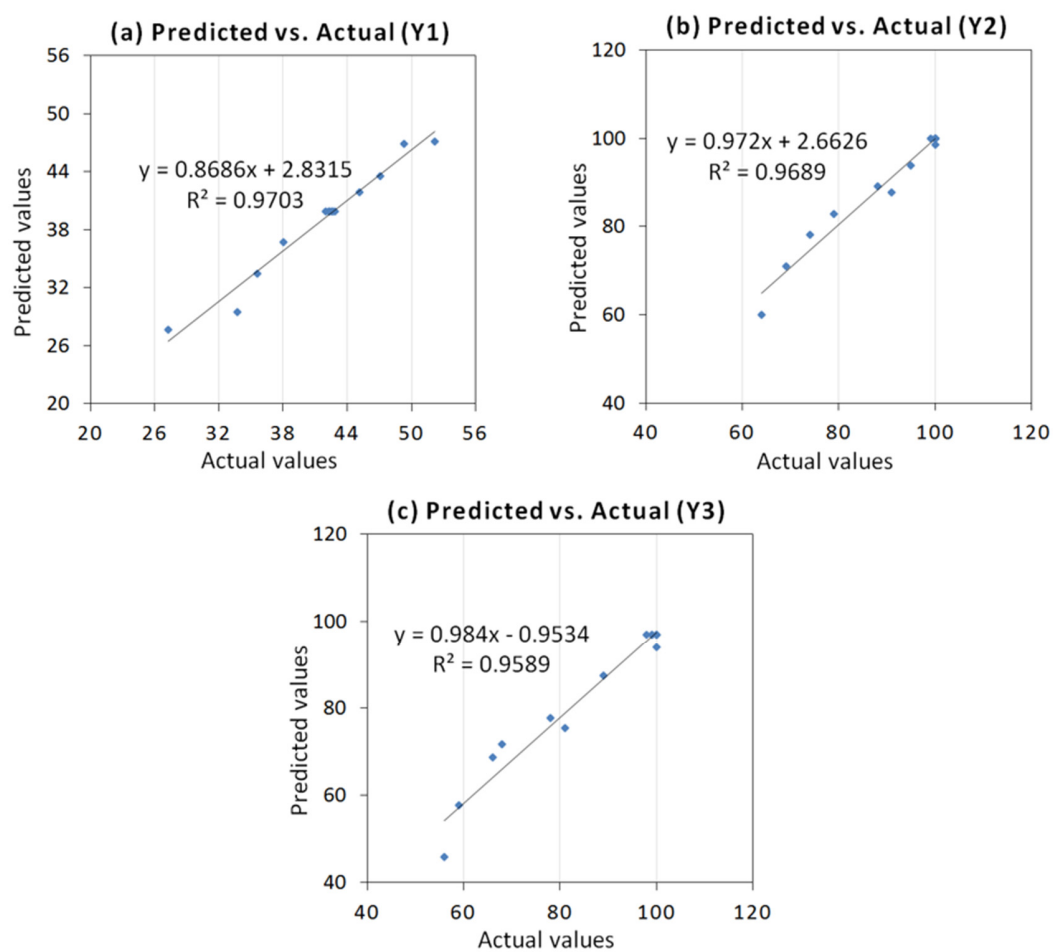

**Figure I.** Predicted vs experimental values for (a) UV protection factor (UPF), (b) %reduction of *E.coli*, and (c) %reduction of *S.aureus*
